# Supplementary material
Source: publisher site journal article supplement (https://www.spandidos-publications.com/6949/downloadSupplementary)
Supplement: Supplementary file 1 [file downloadSupplementary]

## Sheet: Table SV
Table SV, Results of post hoc tests using Dunns
	.y.	group1	group2	n1	n2	statistic	p	p.adj	p.adj.signif
1	riskscore	Favorable	Intermediate/Normal	30	73	3.47581	0.000509321	0.0025466	**
2	riskscore	Favorable	Poor	30	27	3.69256	0.000222005	0.00133203	**
3	riskscore	Favorable	unknow	30	2	2.42125	0.0154673	0.0618693	ns
4	riskscore	Intermediate/Normal	Poor	73	27	1.00223	0.316231	0.563653	ns
5	riskscore	Intermediate/Normal	unknow	73	2	1.41537	0.156959	0.470878	ns
6	riskscore	Poor	unknow	27	2	1.07622	0.281827	0.563653	ns
